# Supplementary material for: Lanthanide-induced helical arrays of [{Co(iii) sepulchrate} ∩ {p-sulfonatocalix[4]arene}] supermolecules
Source: Royal Society of Chemistry journal article supplement (doi:10.1039/b515580k), 2005-12-15
Supplement: b515580k.pdf [file b515580k.pdf]

## Supplementary Information

### Lanthanide-induced helical arrays of [Co(III) sepulchrate] $\cap$ {*p*-sulfonatocalix[4]arene} supermolecules

Christopher B. Smith,<sup>a\*</sup> Leonard J. Barbour,<sup>b</sup> Mohamed Makha,<sup>a</sup> Colin L. Raston,<sup>a\*</sup>  
Alexandre N. Sobolev<sup>a</sup>

<sup>a</sup>*School of Biomedical, Biomolecular and Chemical Sciences, University of Western Australia, Crawley, W.A. 6009, Australia. Email: cbsmith@cyllene.uwa.edu.au*

<sup>b</sup>*Department of Chemistry, University of Stellenbosch, 7602 Matieland, South Africa.*

### Synthesis of I

A hot (~80°) solution of [Co(diOHsar)]Cl<sub>3</sub> **2**<sup>1</sup> (17.1 mg, 3.6 × 10<sup>-5</sup> mol) in water (2 cm<sup>3</sup>) was added to a hot (~80°) solution of *p*-sulfonatocalix[4]arene tetrasodium salt **1** (10 mg, 1.2 × 10<sup>-5</sup> mol) and Pr(O<sub>3</sub>SCF<sub>3</sub>)<sub>3</sub> (14.1 mg, 2.4 × 10<sup>-5</sup> mol) in water (2 cm<sup>3</sup>). The pH was adjusted to 4-5 using 1M aqueous NaOH solution and the solution cooled slowly over 24 h. Small orange crystals formed (3 mg) which were suitable for X-ray diffraction.

### X-Ray crystallography of I

The X-ray diffracted intensities were measured from a single crystal (0.45 x 0.42 x 0.33 mm) at 153 K on a Bruker SMART CCD instrument using a monochromatized Mo-K<sub>α</sub> (λ = 0.71073 Å) X-ray source. Data were corrected for Lorentz and polarization effects and absorption correction applied using multiple symmetry equivalent reflections. The structures were solved by direct method and refined on *F*<sup>2</sup> using Bruker SHELXTL crystallographic package.<sup>2</sup> A full matrix least-squares refinement procedure was used, minimizing  $w(F_o^2 - F_c^2)$ , with  $w = [\sigma^2(F_o^2) + (AP)^2 + BP]^{-1}$ , where  $P = (F_o^2 + 2F_c^2)/3$ . Agreement factors ( $R = \sum||F_o| - |F_c|| / \sum|F_o|$ ,  $wR2 = \{\sum[w(F_o^2 - F_c^2)^2] / \sum[w(F_o^2)^2]\}^{1/2}$  and  $GOF = \{\sum[w(F_o^2 - F_c^2)^2] / (n-p)\}^{1/2}$  are cited, where *n* is the number of reflections and *p* the total number of parameters refined).

**Crystal/refinement details:** C<sub>42</sub>H<sub>57.5</sub>CoN<sub>6</sub>O<sub>20.75</sub>Pr<sub>0.17</sub>S<sub>4</sub>, *M* = 1189.12, *F*(000) = 9894 e, Tetragonal, *I*4<sub>1</sub>/*a* (No. 88), *Z* = 16, *T* = 153 K, *a* = 25.47(5), *c* = 41.51(7) Å, *V* = 26929(68) Å<sup>3</sup>; *D*<sub>c</sub> = 1.173 g cm<sup>-3</sup>;  $\sin\theta/\lambda_{\max}$  = 0.587; *N*(unique) = 10610 (merged from 64020, *R*<sub>int</sub> = 0.1624, *R*<sub>σ</sub> = 0.1175), *N*<sub>o</sub> (*I* > 2σ(*I*)) = 5316; *R* = 0.1695, *wR2* = 0.3882 (*A*, *B* = 0.25, 250.0), *GOF* = 1.019;  $|\Delta\rho_{\max}|$  = 2.4(2) e Å<sup>-3</sup>.

1. R. J. Geue, T. W. Hambley, J. M. Harrowfield, A. M. Sargeson and M. R. Snow, *J. Am. Chem. Soc.*, 1984, **106**, 5478.

# Supplementary Material (ESI) for Chemical Communications  
# This journal is © The Royal Society of Chemistry 2006

2. G. M. Sheldrick, SHELX-97: Structure solution and refinement programs, University of Göttingen, 1997; Bruker SMART, SAINT, SADABS & SHELXTL. v5.1., 1997, Bruker AXS Inc., Madison, Wisconsin, USA.
